# Supplementary material
Source: Springer Nature journal article supplement (https://www.springermedizin.de/resource/supplementary/12911_2006_141_MOESM5_ESM.pdf/9527216)

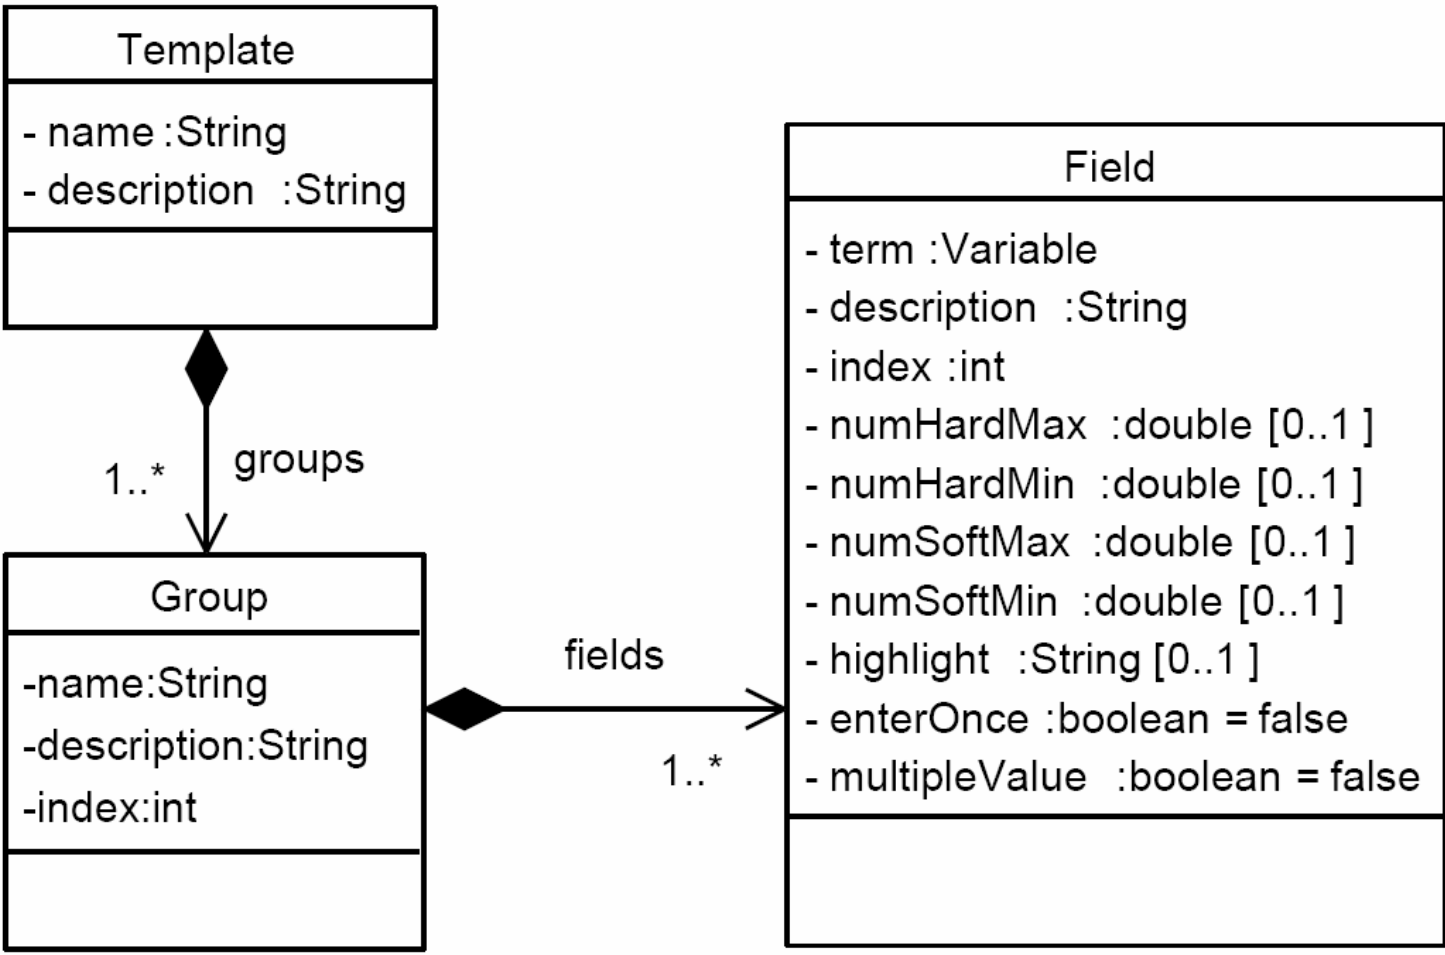

Supplement: MOESM5 [file 9527216]
